# Supplementary material for: Functional Characterization of Arylalkylamine N-Acetyltransferase, a Pivotal Gene in Antioxidant Melatonin Biosynthesis from Chlamydomonas reinhardtii
Source: MDPI journal article supplement (doi:10.3390/antiox11081531), 2022-08-05
Supplement: s1 [file s1]

**Table S1.** Sequences of primers used for polymerase chain reaction.

| Gene     | Forward (5'-3')                       | Reverse (5'-3')                       |
|----------|---------------------------------------|---------------------------------------|
| CrAANAT  | ATG GCT GAG GAG TCG CTC G             | GGC CTC AGC AGC CTC TGC               |
| UBQ5     | CCG ACT ACA ACA TCC AGA AGG AG        | AAC AGG AGC CTA CGC CTA AGC           |
| OsLOGL1  | GCA GAA GGA TTT ATT AAG GCC G         | TTC CAT AAC CAA GCT CTG ACA T         |
| OsLOGL3  | TGA ACG TTG ATG GGT ACT ACA A         | ATC ATG GTA AGG GAC GTA TTC C         |
| OsLOGL10 | GAA GAA GAG GAG CTA CCA TGA C         | TCA TGA GAG TCT TGG GAA TGA C         |
| OsCKX2   | GAG GTG TTC TAC ACG GTG GG            | GCA GGT ACT GCT TGT AGG CT            |
| OsCKX4   | GCA CCA TCA TCC TCA GGT CA            | AAG TGG GCT TTC CAC TGC TT            |
| OsCKX10  | GCT TCC GTG GAT CAG AAA CTT G         | ATG CGT CCC TGA CGA ACA               |
| D2       | ATG TGA TAA CAG AGA CGC TGC GGT       | TGG TGA CCA AGT GGT GAA GGA AGA       |
| D4       | GGA GAA GAA CAT GGA ATC AC            | GTA ATC TTG AAC GCG GAT ATG           |
| D11      | TGA GGC ACT GAG ATG TGG               | AAG GTG ATG GAG GAA GAA               |
| RAVL1    | CGA CTT CCG CAA CAT CAA               | GGC ATC CGT AGC GAC AAT               |
| BRI1     | CAG CTA CTT GGC TAT CTT GAA GCT CAG C | CCA TTC TTG TTG AAG GTG TAC TCC GTG C |
| BZR1     | ATG ACG GCC ATT ATT GCC GAG CA        | TCG CCC AAA TCG CAG CAT               |
| ACT1     | TGC TAT GTA CGT CGC CAT CCA           | AAT GAG TAA CCA CGC TCC GTC AA        |
